# Supplementary material
Source: PubMed Central journal article supplement (PMC3640814)
Supplement: NIHMS461628-supplement-Supp_A.pdf [file NIHMS461628-supplement-Supp_A.pdf]

# **A Variant in *FTO* shows association with melanoma risk not due to BMI**

Mark M Iles et al\*

\*a full list of authors appears in the main paper

## **Contents**

1. Supplementary Tables
2. Supplementary Figures
3. Supplementary Note
  - Supplementary analyses and results
  - Functional evidence
  - Replication samples
  - References
4. GenoMEL membership
5. Q-MEGA and AMFS investigators

## Supplementary Tables

Supplementary Table I Numbers of cases and controls from each study and numbers of cases and controls with BMI data from each study.

|                     | cases         | controls      | cases with BMI | controls with BMI |
|---------------------|---------------|---------------|----------------|-------------------|
| GenoMEL Phase 1     | 1,353         | 3,566         | 144            | 1,355             |
| GenoMEL Phase 2     | 1,449         | 4,043         | 466            | 1,541             |
| Leeds case-control* | 680           | 1,785         | 664            | 302               |
| Harvard*            | ≥421          | ≥2,349        | 421            | 2,349             |
| Australia           | 2,168         | 4,385         | 413            | 1210              |
| Italy               | 537           | 430           | 143            | 122               |
| Houston             | 1,802         | 1,025         | 929            | 891               |
| Iceland             | 926           | 34,656        | 679            | 25,189            |
| the Netherlands     | 729           | 1,651         | 711            | 1,613             |
| Vienna              | 1,174         | 929           | 542            | 406               |
| Milan               | 555           | 368           | 0              | 0                 |
| Sweden              | 1,010         | 499           | 0              | 0                 |
| Valencia            | 576           | 1,769         | 0              | 0                 |
| Zaragoza            | 287           | 1,778         | 0              | 0                 |
| <b>Total</b>        | <b>13,667</b> | <b>59,233</b> | <b>5,112</b>   | <b>34,978</b>     |

\* 421 cases and 2,349 controls were genotyped for rs16953002 and 494 cases and 5,627 controls imputed for rs8050136. Leeds case-control sample genotyped for rs16953002 but not rs8050136. Case/control numbers for rs8050136 are 13,060/60,726.
