# Supplementary material
Source: PubMed Central journal article supplement (PMC3640814)
Supplement: NIHMS461628-supplement-Supp_B.pdf [file NIHMS461628-supplement-Supp_B.pdf]

Supplementary Table 2 Results of association between rs16953002 and melanoma, including results for genotyped subjects only, those with BMI only and adjusting for BMI (split into quartiles) as a categorical covariate.

|                 | rs16953002 and melanoma |                      |                  |                       | rs16953002 and melanoma genotyped only |                  |                        | rs16953002 and melanoma BMI only |                  |       | rs16953002 and melanoma BMI adjusted |                  |      |
|-----------------|-------------------------|----------------------|------------------|-----------------------|----------------------------------------|------------------|------------------------|----------------------------------|------------------|-------|--------------------------------------|------------------|------|
|                 | MAF                     | No of cases/controls | OR (95% CI)      | P                     | No of cases/controls                   | OR (95% CI)      | P                      | No of cases/controls             | OR (95% CI)      | P     | No of cases/controls                 | OR (95% CI)      | P    |
| GenoMEL Phase I | 0.16                    | 1,353 / 3,566        | 1.32 (1.17,1.50) | 1.3×10 <sup>-5</sup>  | 687 / 3,461                            | 1.28 (1.09,1.51) | 0.003                  | 144 / 1,355                      | 1.16 (1.03,1.31) | 0.02  | 144 / 1,355                          | 1.16 (1.03,1.31) | 0.02 |
| All replicates  | 0.17                    | 12,314 / 55,667      | 1.14 (1.09,1.19) | 4.8×10 <sup>-9</sup>  | 12,314 / 55,667                        | 1.14 (1.09,1.19) | 4.8×10 <sup>-9</sup>   | 4,968 / 33,623                   | 1.09 (1.02,1.17) | 0.02  | 4,968 / 33,623                       | 1.06 (0.99,1.13) | 0.08 |
| Overall         | 0.17                    | 13,667 / 59,233      | 1.16 (1.11,1.20) | 3.6×10 <sup>-12</sup> | 13,001 / 59,128                        | 1.15 (1.10,1.19) | 1.48×10 <sup>-10</sup> | 5,112 / 34,978                   | 1.11 (1.04,1.18) | 0.001 | 5,112 / 34,978                       | 1.08 (1.02,1.14) | 0.01 |
