# Supplementary material
Source: PubMed Central journal article supplement (PMC3640814)
Supplement: NIHMS461628-supplement-Supp_C.pdf [file NIHMS461628-supplement-Supp_C.pdf]

## Supplementary Figures

Supplementary Figure 1 Forest plot of estimated beta coefficients and p-values for effect of rs16953002 [A] on log adjusted BMI. Horizontal bars indicate 95% confidence intervals. Results shown for combined GenoMEL Phase 1, Phase 2 and Leeds cohort data combined (GenoMEL) followed by subsequent non-UK replication data and meta-analysis for all data combined.

Supplementary Figure 2 Results of stratified trend tests of imputed data for association with BMI in region around *FTO* in GenoMEL Phase 1 and 2 data combined.  $-\log_{10}p$  values for association between SNPs in the region of *FTO* and  $\log(\text{BMI})$  (adjusted for age and age<sup>2</sup>) with sex and case-control status as covariates are shown adjusted for geographic region. Colour of points indicates degree of LD with rs8050136 (indicated by purple circle) the most strongly-associated genotyped SNP. SNPs genotyped in all GenoMEL samples are plotted as circles, SNPs imputed in all samples as crosses and SNPs genotyped in some samples and imputed in others (as a result of chip differences) as squares. Positions of genes are given underneath the graph and estimated recombination rates also given by the blue line along the bottom, with scale on the right hand axis. Plot produced using LocusZoom<sup>1</sup>.

Supplementary Figure 3 Forest plot of estimated beta coefficients and p-values for effect of rs8050136 on log adjusted BMI. Horizontal bars indicate 95% confidence intervals. Results shown for combined GenoMEL Phase 1, Phase 2 and Leeds cohort data combined (GenoMEL) followed by subsequent non-UK replication data and meta-analysis for all data combined.

Supplementary Figure 4 Association between SNPs in *FTO* region and BMI in GIANT data<sup>2</sup>.  $-\log_{10}p$  values for association between SNPs in the region and BMI. Colour of points indicates degree of LD with rs16953002 (indicated by purple circle) the most strongly melanoma-associated genotyped SNP. rs8050136 indicated by red line. Positions of genes are given underneath the graph and estimated recombination rates also given by the blue line along the bottom, with scale on the right hand axis. Plot produced using LocusZoom<sup>1</sup>.

Supplementary Figure 5 Forest plot of estimated per-allele ORs and p-values for effect of rs8050136 on melanoma risk. Horizontal bars indicate 95% confidence intervals. Results shown for combined GenoMEL Phase 1, Phase 2 and Leeds cohort data combined (GenoMEL) followed by subsequent non-UK replication data and meta-analysis for all data combined.

Supplementary Figure 6 Forest plot for original GenoMEL data split by region (Italy, France, Scandinavia, Spain, UK&NL (UK and Netherlands), Israel and Poland) and Phase (P1 - Phase 1, P2 - Phase 2). Estimated per-allele ORs given for each region as well as combined in a meta analysis for the Phase 1 and Phase 2 data. Horizontal bars indicate 95% confidence intervals.

Supplementary Figure 7 Forest plot of estimated per-allele ORs and p-values for effect of rs16953002 on melanoma risk within each quartile of BMI and quartiles 2-4 combined. Horizontal bars indicate 95% confidence intervals. Results plotted

separately for each data set followed by results for a meta-analysis of all data sets by quartile.

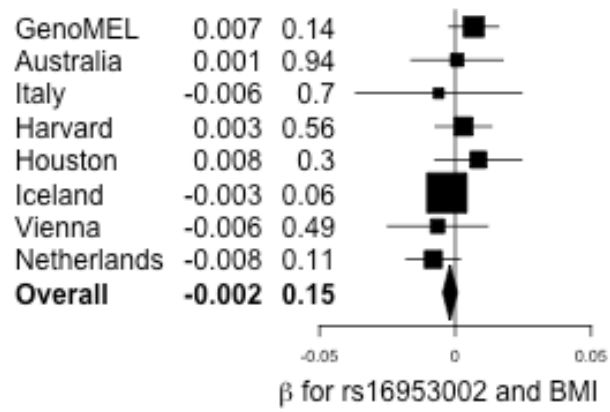

Supplementary Figure 1

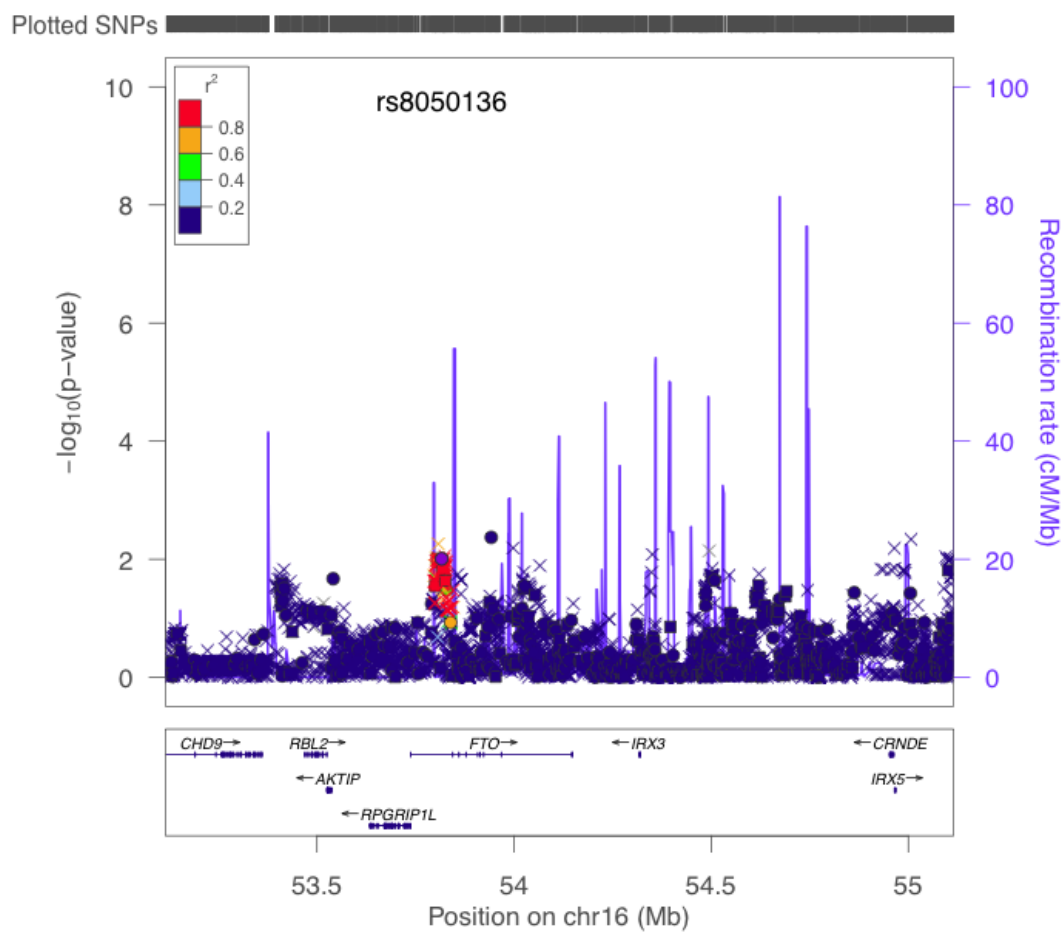

Supplementary Figure 2

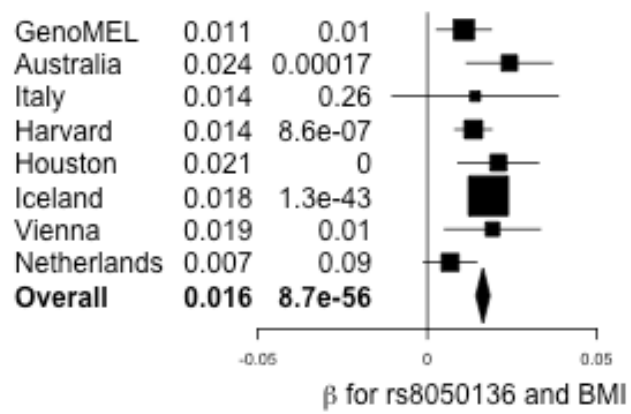

Supplementary Figure 3

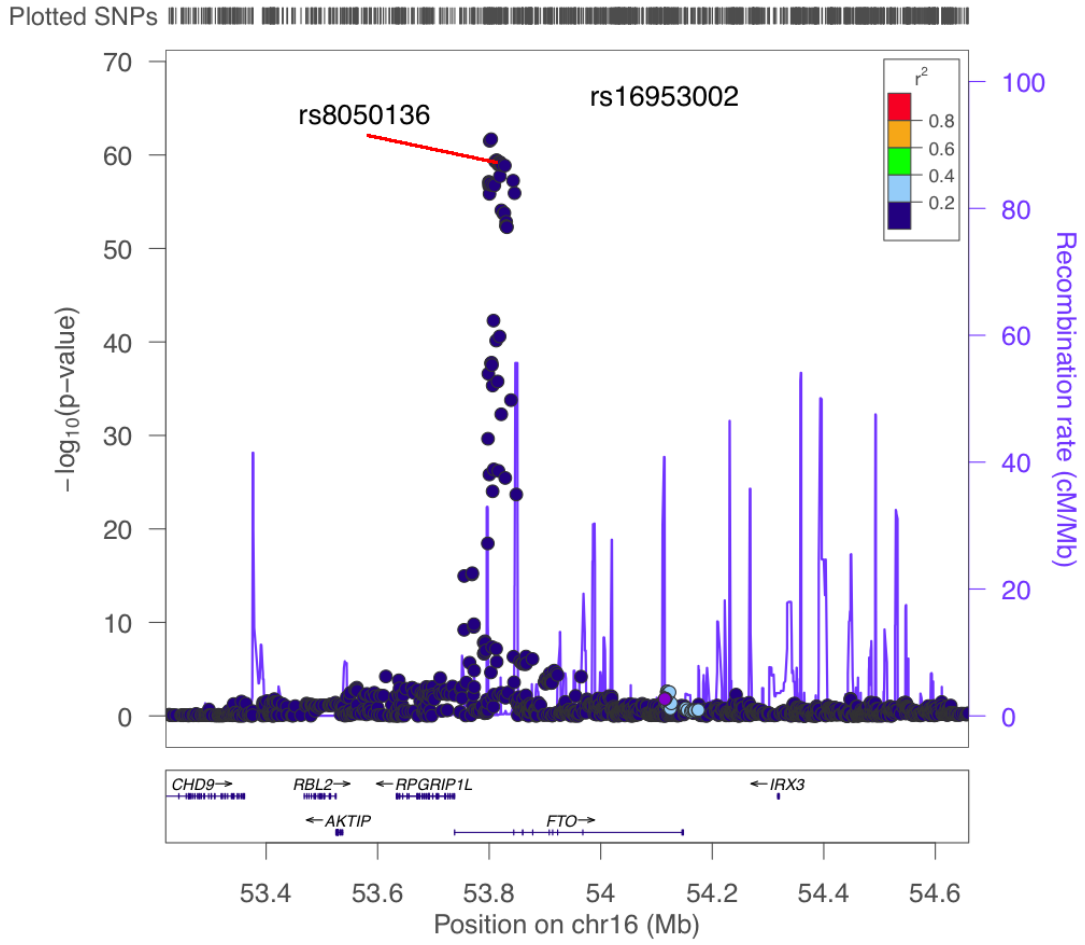

Supplementary Figure 4

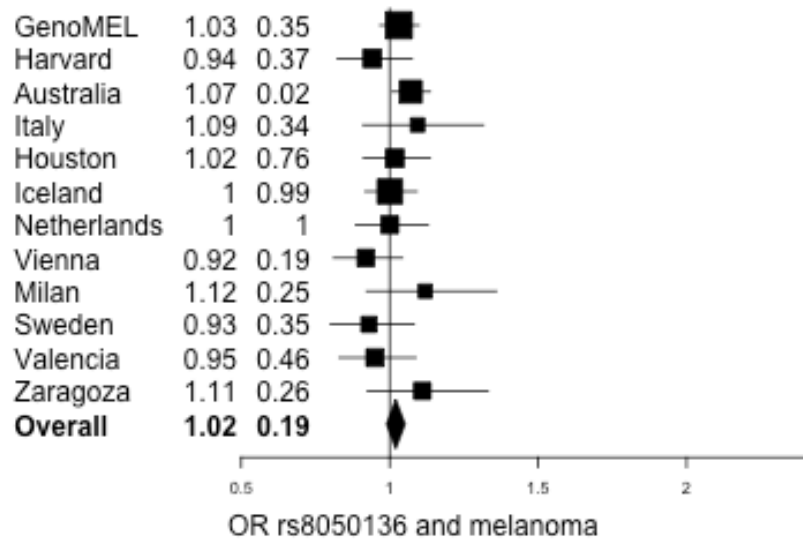

Supplementary Figure 5

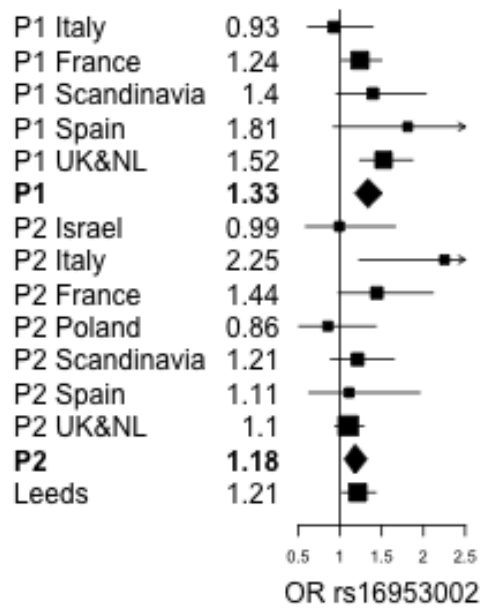

Supplementary Figure 6



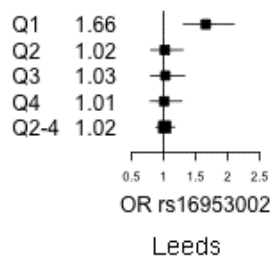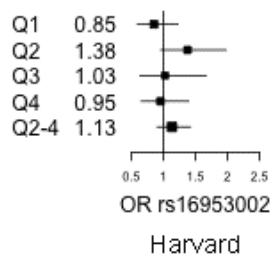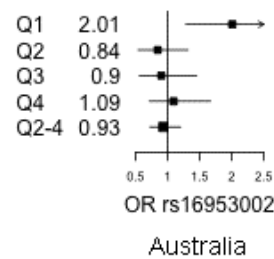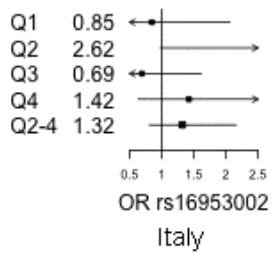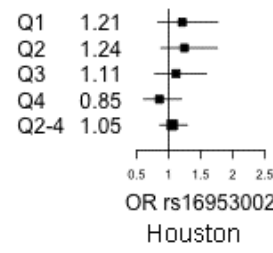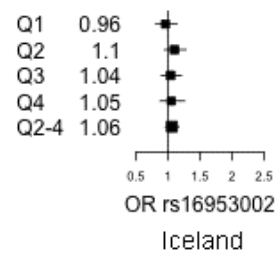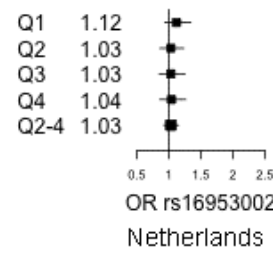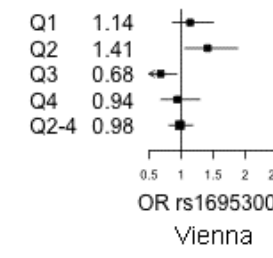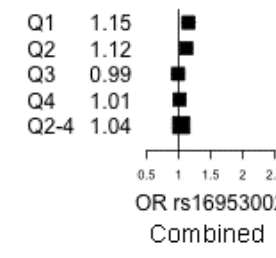

Supplementary Figure 7

## Supplementary Note

### Supplementary analyses and results

#### Analysis only of genotyped data

We have established that the imputation of rs16953002 is of high quality, given the strong concordance we see between the genotypes and their imputed predictions in the 3,694 GenoMEL samples (see main paper). However, to be certain, we have also analysed just those data that have been genotyped at rs16953002. This excludes about half of the cases in the GenoMEL Phase I data. When we do this we see that the estimated effect size is very slightly (but not significantly) reduced and the association is somewhat less significant overall (increasing from  $3.6 \times 10^{-12}$  to  $1.48 \times 10^{-10}$ ) as might be expected when the sample size is thus reduced (see Supplementary Table 2).

We further reanalysed both the association between rs16953002 and melanoma and between rs8050136 and melanoma, using only samples that were genotyped for both SNPs. In addition to the Phase I GenoMEL samples that were removed, we also excluded the Leeds case-control samples and the Harvard samples, neither of which were genotyped at rs8050136. This results in an overall 13% reduction in cases compared to the initial analysis of rs16953002 and a 7% reduction in controls. The effect size of the association between rs16953002 and melanoma is reduced, but not significantly (OR=1.16 95%CI:(1.11,1.21)) and the p-value sees a further moderate increase to  $3.1 \times 10^{-9}$ . Similarly rs8050136 has a virtually unchanged effect size on melanoma risk (OR=1.03 95%CI:(0.99,1.06)) with, once again, a non-significant p-value of 0.12.

#### Analysis only of data with BMI information

The GIANT data<sup>2</sup> in particular establish beyond reasonable doubt that while rs8050136 is very strongly associated with BMI, there is no strong association between rs16953002 and BMI. However our own data have far smaller numbers of individuals with BMI recorded. For comparison we look at the association between rs16953002 and melanoma only in those individuals with BMI recorded. The results of this can be seen in Supplementary Table 2.

Despite losing 63% of cases and 40% of controls by excluding those without BMI, we find that the association between between rs16953002 and melanoma risk persists although, with  $p=0.001$ , no longer reaches genome-wide significance, perhaps not surprisingly.

When we include BMI itself as a categorical covariate (with categories based on quartiles) the association remains nominally significant at  $p=0.01$ . In GenoMEL genome-wide genotyped subjects were preferentially selected to have either family history, multiple primaries or early onset. Those with BMI recorded are largely from the Leeds case-control study, most of whom do not have any of the preferential characteristics listed above. It has previously been observed<sup>3,4</sup> that those with family history and, to a lesser extent, those with multiple primaries have a larger estimated

effect size at disease-associated loci, as might be expected given their genetic enhancement. Thus when we see here that in the GenoMEL samples the estimated effect size is lower in those with BMI, this is most likely due to the lack of any genetic enhancement in those subjects with BMI recorded.

It was also noted in the Icelandic samples that those with BMI information had a significantly lower effect size for the association with melanoma than did those without BMI recorded. This was due to a lower risk allele frequency in cases with BMI information than in cases without BMI information. No difference in allele frequency was observed between controls with and without BMI information. It was noticed that cases with BMI information were more likely to be male and have an earlier age at onset, which may explain the difference observed.

### **Functional evidence**

SNPs overlapping regulatory elements, such as transcription factor binding sites can be identified using the recent ENCODE data as well other data sources<sup>5,6</sup>. The score is based on the data types available at that coordinate. So a score of 2a requires TF binding + matched TF motif + matched DNase Footprint + DNase peak. To score more highly than this requires supporting eQTL data. Looking up the *FTO* gene (at RegulomeDB, <http://RegulomeDB.org/>), 2,148 SNPs are identified, only 8 of which reach the highest score possible without eQTL data (score 2a - “Likely to affect binding”). The 8 SNPs are rs7186637, rs73612011, rs16952525, rs75390518, rs77931547, rs79028504, rs116959378 and rs16953002.

Six of these are in intron 1, the location of most of the BMI-associated SNPs, 5 of these in a 5.4kb region less than 1kb from rs8050136. The other two SNPs are 13kb apart from one another in intron 8 and, interestingly, one of these is rs16953002, the melanoma-associated SNP (see Supplementary material for further details).

The region surrounding rs16953002 that scores 2a is only 26bp long (54114807-54114833). DNase footprinting indicates that rs16953002 overlaps a potential AR binding site in multiple cell types. 24 unique proteins bind to the rs16953002 region in a variety of cells. 10 of these are in the *FOXA1* pathway (of a total of 43 in the genome, hypergeometric test  $p=3\times 10^{-15}$ ) and 10 are in the *SMAD2/3* pathway (of a total of 81 in the genome, hypergeometric test  $p=2.8\times 10^{-12}$ ) (from ToppGene<sup>7</sup> <http://toppgene.cchmc.org/>), suggesting possible hypotheses for further functional analysis.

### **Replication samples**

#### *Australia*

The combined 2,168 cases represents 1,619 collected through the Queensland study of Melanoma: Environment and Genetic Associations (Q-MEGA)<sup>8</sup> and 549 cases collected by the Australian Melanoma Family Study (AMFS)<sup>9</sup>. The combined 4,385 controls represent 3 control sets: 1,799 unrelated individuals from the Brisbane Adolescent Twin Study<sup>10,11</sup>, 2,155 endometriosis patients recruited by The Queensland Institute of Medical Research (QIMR) from 1995 to 2002<sup>12</sup> and 431 controls collected by the AMFS study<sup>9</sup>.

Q-MEGA – Australian melanoma cases of European descent (n=1,697) were ascertained from four population-based studies of melanoma conducted between 1987 and 1995. There were two control sets. One was a sample of 1,799 unrelated individuals recruited through schools. 20% were taken from twins or siblings and 80% from the parents of participants in the Brisbane Adolescent Twin Study<sup>10,11</sup>. The second control set was of 2,155 endometriosis patients recruited by The Queensland Institute of Medical Research (QIMR) from 1995 to 2002<sup>12</sup>. AMFS - Recruitment occurred from 2001-2005 and case probands identified from population-based state cancer registries. Control probands were selected from the electoral roll and frequency-matched to cases by city, age and sex. Blood was requested from all probands. A 20ml blood sample was collected in EDTA tubes by local pathology services and transported to a central laboratory in Sydney within 48h of collection. White blood cells were separated on a Ficoll gradient and plasma obtained by centrifugation, and stored at -70°C. Guthrie Spots were obtained from 1ml blood. Remaining blood was used for DNA extraction. Buccal swabs were collected from participants who did not wish to give blood. All AMFS case probands and population control probands were aged between 18-39 years inclusive.

The samples with BMI information were from AMFS. In the AMFS, height and weight were measured only for those participants who attended a clinical skin examination. All case and control probands were invited to attend a clinical skin examination, which were conducted at dermatology clinics in Brisbane, Sydney, and Melbourne by dermatology trainees trained on the study protocol. Attending a skin examination was a preferred but not essential component of participation in the overall study; it was completed by 73% of cases, 55% of population controls and 67% of spouse or friend controls.

Cases were genotyped on Illumina Omni1-Quad or HumanHap610 while controls were genotyped on Illumina Omni1-Quad or HumanHap610 or HumanHap670<sup>10</sup>

Principal component analysis was used for outlier removal and correction for population stratification using the first 10 principal components. Following these quality control steps lambda was 1.04. A more detailed description of the QC procedures applied to these data can be found in a previous publication<sup>10</sup>.

*Houston (M.D. Anderson)*

931 cutaneous melanoma (CM) non-Hispanic white patients were recruited together with 1,026 cancer-free controls (friends or acquaintances of patients reporting to other clinics at M.D. Anderson) frequency matched on age and sex. The majority of these also had BMI measured. These were supplemented with an additional 873 individuals presenting for treatment for CM at MD Anderson which did not have BMI recorded. All samples were collected between March 1998 and August 2008.

Samples were genotyped using the Illumina HumanOmni1-Quad\_v1-0\_B array and called using the BeadStudio algorithm. No adjustment was made for ethnicity as the genomic inflation factor was 1.02. Data were analysed by regressing case-control status on genotype (coded according to an additive model). This study has been previously published<sup>13</sup> and a more detailed description of the QC procedures applied to these data can be found there.

## *Harvard*

The dataset consisted of 494 melanoma cases and 5,628 controls from the Nurses' Health Study and the Health Professionals Follow-up Study. Cases from both cohorts had a pathologically confirmed invasive melanoma diagnosed any time after baseline up to the 2008 follow-up cycle. All controls were from existing GWAS of other traits in the two cohorts and were not diagnosed for melanoma. All subjects were US non-Hispanic Caucasians. Self-reported BMI was collected in both cohorts.

Samples from existing GWAS were previously genotyped using Illumina and Affymetrix arrays. Additional melanoma cases were genotyped using the Illumina HumanHap610 array. Based on the genotyped SNPs and haplotype information in the NCBI build 35 of phase II Hapmap CEU data, rs8050136 was imputed using MACH<sup>14,15</sup> (imputation  $r^2 = 1$ ). rs16953002 failed imputation and only the 421 cases and 2349 controls for which the SNP was genotyped were used. Further details of the Harvard data including QC procedures can be found elsewhere<sup>16</sup>.

BMI was recorded for all participants.

## *Italy*

The samples come from three case-control studies conducted in Central and Northern Italy (Cesena, L'Aquila and Genoa), all genotyped with an iSelect Illumina Infinium custom array at the NCI Core Genotyping Facility.

276 samples came from the Cesena study<sup>17,18,19</sup>. Here, cases were incident sporadic melanoma patients, without family history of melanoma, aged 17-77, negative for the CDKN2A/CDK4 mutations, diagnosed between December 1994 and January 1999 at the Dermatology Unit of Maurizio Bufalini Hospital in Cesena. Controls were spouses or close friends of the cases, patients treated at the same hospital for minor accidental trauma or healthy hospital personnel recruited during the same period without a history of melanoma and coming from the same geographical areas as the cases. They were frequency-matched by age and gender to cases. BMI was collected on these samples.

343 samples came from the L'Aquila study<sup>19</sup>. Here, sporadic melanoma patients, negative for the CDKN2A/CDK4 mutations, diagnosed at the Departments of Dermatology of the Universities of L'Aquila, Florence or Modena in central Italy, aged 17-82, were recruited between 2000 and 2002. Subjects treated for diseases unrelated to melanoma at the Internal Medicine Departments of the corresponding Universities were recruited as controls for the study. They were frequency matched by sex and age ( $\pm 1$  year) and study area. BMI was not recorded for these samples.

350 individuals came from the Genoa study of sporadic melanoma cases diagnosed between 2000-2007 at the units of dermatology, medical oncology and plastic surgery of the National Cancer Research Institute and San Martino Hospital, Genoa, in Northern Italy. Melanoma cases were older than 18 years of age, without family history of melanoma and negative for the CDKN2A/CDK4 mutations. Control subjects without history of melanoma, older than 18 years of age were recruited

during the same period. BMI was not recorded for these samples. QC procedures are described in the references given above<sup>17,18,19,20</sup>.

### *Valencia*

For melanoma patients, the present study utilized data held on the database of the Dermatology Department of the Instituto Valenciano de Oncología, Valencia, Spain. A detailed description of this database can be found in previous reports<sup>21,22,23</sup>. Briefly, this database includes incident and prevalent melanoma cases definitively treated at this institution, a referral skin cancer center for the provinces of Valencia, Alicante and Castellón, with a catchment population of ~5 million people. Clinical and pathologic data from these patients are prospectively collected since January 2000 by medical history review, personal interview and clinical examination performed by an expert dermatologist.

Disease free and ethnically matched healthy control subjects were recruited at Transfusion Center of Valencia. The phenotypic characteristics were obtained from a self-administered structured questionnaire. All the patients in the study had signed an informed consent and the study protocol was approved by institutional ethics boards.

### *Other replication data*

Sample collections from Iceland, the Netherlands, Vienna, Milan, Sweden and Zaragoza have been described previously<sup>24,25</sup>. Collection of Icelandic BMI is described elsewhere<sup>26</sup>, approximately 23% being self-reported and the remainder measured at recruitment. Dutch BMI was self-reported by almost all participants. Viennese BMI was recorded by a nurse at the recruitment interview. As BMI is not an established risk factor, it was not recorded in approximately the first half of the Viennese study recruitment, after which it was systematically recorded.

## **References**

1. Pruim R.J. *et al.* LocusZoom: regional visualization of genome-wide association scan results. *Bioinformatics* **26**, 2336-2337 (2010).
2. Speliotes E.K. *et al.* Association analyses of 249,796 individuals reveal 18 new loci associated with body mass index. *Nat. Genet.* **42**, 937-948 (2010).
3. Bishop D.T. *et al.* Genome-wide association study identifies three loci associated with melanoma risk. *Nat. Genet.* **41**, 920-925 (2009).
4. Barrett J.H. *et al.* Genome-wide association study identifies three new melanoma susceptibility loci. *Nat. Genet.* **43**, 1108-1113 (2011).
5. Boyle A.P. *et al.* Annotation of functional variation in personal genomes using RegulomeDB. *Genome Res.* **22**, 1790-1797 (2012).
6. Schaub M.A. *et al.* Linking disease associations with regulatory information in the human genome. *Genome Res.* **22**, 1748-1759 (2012).

7. Chen J., Bardes E.E., Aronow B.J. & Jegga A.G. ToppGene Suite for gene list enrichment analysis and candidate gene prioritization. *Nucleic Acids Res.* **37**:W305-W311 (2009).
8. Baxter, A.J. *et al.* The Queensland Study of Melanoma: environmental and genetic associations (Q-MEGA); study design, baseline characteristics, and repeatability of phenotype and sun exposure measures. *Twin Res. Hum. Genet.* **11**, 183-196 (2008).
9. Cust, A.E. *et al.* Population-based, case-control-family design to investigate genetic and environmental influences on melanoma risk: Australian Melanoma Family Study. *Am. J. Epidemiol.* **170**, 1541-1554 (2009).
10. MacGregor S. *et al.* Genome-wide association study identifies a new melanoma susceptibility locus at 1q21.3. *Nat. Genet.* **43**, 1114-1118 (2011).
11. Zhu G. *et al.* A major quantitative-trait locus for mole density is linked to the familial melanoma gene CDKN2A: a maximum-likelihood combined linkage and association analysis in twins and their sibs. *Am. J. Hum. Genet.* **65**, 483-492 (1999).
12. Painter J.N. *et al.* Genome-wide association study identifies a locus at 7p15.2 associated with endometriosis. *Nat. Genet.* **43**, 51-54 (2011).
13. Amos CI *et al.* Genome-wide association study identifies novel loci predisposing to cutaneous melanoma. *Hum. Mol. Genet.* **20**, 5012-5023 (2011).
14. Li Y., Willer C.J., Sanna S. & Abecasis G.R. Genotype Imputation. *Annu. Rev. Genomics Hum. Genet.* **10**, 387-406 (2009).
15. Li Y., Willer C.J., Ding J., Scheet P. & Abecasis G.R. MaCH: using sequence and genotype data to estimate haplotypes and unobserved genotypes. *Genet. Epidemiol.* **34**, 816-834 (2010).
16. Song F *et al.* Exonuclease I (EXO1) gene variation and melanoma risk. *DNA Repair (Amst).* **11**, 304-309 (2012).
17. Landi, MT *et al.* Combined risk factors for melanoma in a Mediterranean population. *Br. J. Cancer.* **85**, 1304-1310 (2001).
18. Landi, MT *et al.* MC1R, ASIP, and DNA repair in sporadic and familial melanoma in a Mediterranean population. *J. Natl. Cancer Inst.* **97**, 998-1007 (2005).
19. Landi, MT *et al.* MC1R Germline Variants Confer Risk for BRAF-Mutant Melanoma. *Science* **313**, 521-522 (2006).
20. Fargnoli, MC *et al.* Re: MC1R, ASIP, and DNA repair in sporadic and familial melanoma in a Mediterranean population. *J. Natl. Cancer Inst.* **98**, 144-145 (2006).
21. Nagore E. *et al.* Comparison between familial and sporadic cutaneous melanoma

in Valencia, Spain. *J. Eur. Acad. Dermatol. Venereol.* **22**, 931-936 (2008).

22. Nagore E., Pereda C., Botella-Estrada R., Requena C., Guillén C. Acral lentiginous melanoma presents distinct clinical profile with high cancer susceptibility. *Cancer Causes Control* **20**, 115-119 (2009A).

23. Nagore E. et al. Clinical and epidemiologic profile of melanoma patients according to sun exposure of the tumor site. *Actas. Dermosifiliogr.* **100**, 205-211 (2009B).

24. Stacey SN et al. New common variants affecting susceptibility to basal cell carcinoma. *Nat. Genet.* **41**, 909-914 (2009).

25. Wendt J., Schanab O., Binder M., Pehamberger H., Okamoto I. Site-dependent actinic skin damage as risk factor for melanoma in a central European population. *Pigment Cell Melanoma Res.* **25**, 234-242 (2012).

26. Thorleifsson et al., Genome-wide association yields new sequence variants at seven loci that associate with measures of obesity. *Nat. Genet.* **41**, 18-24 (2009).



## **GenoMEL membership:**

*Australian Melanoma Family Study:* Graham J. Mann, John L. Hopper, Joanne F. Aitken, Bruce K. Armstrong, Graham G. Giles, Richard F. Kefford, Anne Cust, Mark Jenkins, Helen Schmid.

*Barcelona:* Paula Aguilera, Celia Badenas, Cristina Carrera, Francisco Cuellar, Daniel Gabriel, Estefania Martinez, Melinda Gonzalez, Pablo Iglesias, Josep Malvey, Rosa Marti-Laborda, Montse Mila, Zighe Ogbah, Joan-Anton Puig Butille, Susana Puig and Other members of the Melanoma Unit: Lúcia Alós, Ana Arance, Pedro Arguís, Antonio Campo, Teresa Castel, Carlos Conill, Jose Palou, Ramon Rull, Marcelo Sánchez, Sergi Vidal-Sicart, Antonio Vilalta, Ramon Vilella.

*Brisbane: The Queensland study of Melanoma: Environmental and Genetic Associations (Q-MEGA) Principal Investigators are:* Nicholas G. Martin, Grant W. Montgomery, David Duffy, David Whiteman, Stuart MacGregor, Nicholas K. Hayward. *The Australian Cancer Study (ACS) Principal Investigators are:* David Whiteman, Penny Webb, Adele Green, Peter Parsons, David Purdie, Nicholas Hayward.

*Emilia-Romagna:* Maria Teresa Landi, Donato Calista, Giorgio Landi, Paola Minghetti, Fabio Arcangeli, Pier Alberto Bertazzi.

*Genoa: Department of Internal Medicine and Medical Specialties, Laboratory of Genetics of Rare Hereditary Cancers, University of Genoa/San Martino-IST Research Hospital:* Giovanna Bianchi Scarrà, Paola Ghiorzo, Lorenza Pastorino, William Bruno, Sabina Nasti, Linda Battistuzzi, Paola Origone, Virginia Andreotti. *Medical Oncology Unit, San Martino-IST Research Hospital:* Paola Queirolo.

*Glasgow:* Rona Mackie, Julie Lang.

*Leeds:* Julia A Newton Bishop, Paul Affleck, Jennifer H Barrett, D Timothy Bishop, Jane Harrison, Mark M Iles, Juliette Randerson-Moor, Mark Harland, John C Taylor, Linda Whittaker, Kairen Kukalich, Susan Leake, Birute Karpavicius, Sue Haynes, Tricia Mack, May Chan, Yvonne Taylor, John Davies, Paul King.

*Leiden: Department of Dermatology, Leiden University Medical Centre:* Nelleke A Gruis, Frans A van Nieuwpoort, Coby Out, Clasine van der Drift, Wilma Bergman, Nicole Kukutsch, Jan Nico Bouwes Bavinck. *Department of Clinical Genetics, Centre of Human and Clinical Genetics, Leiden University Medical Centre:* Bert Bakker, Nienke van der Stoep, Jeanet ter Huurne. *Department of Dermatology, HAGA Hospital, The Hague:* Han van der Rhee. *Department of Dermatology, Reinier de Graaf Groep, Delft:* Marcel Bekkenk. *Department of Dermatology, Sint Franciscus Gasthuis, Rotterdam:* Dyon Snels, Marinus van Praag. *Department of Dermatology, Ghent University Hospital, Ghent, Belgium:* Lieve Brochez and colleagues. *Department of Dermatology, St. Radboud University Medical Centre, Nijmegen:* Rianne Gerritsen and colleagues. *Department of Dermatology, Rijnland Hospital, Leiderdorp:* Marianne Crijns and colleagues. *Dutch patient organisation, Stichting Melanoom, Purmerend. The Netherlands Foundation for the detection of Hereditary Tumors, Leiden:* Hans Vasen. *ServiceXS:* Wilbert van Workum, Bart Janssen, Marjolein Janssen and Suzanne Mulder

*Lund:* Lund Melanoma Study Group: Håkan Olsson, Christian Ingvar, Göran Jönsson, Åke Borg, Anna Måsbäck, Lotta Lundgren, Katja Baeckenhorn, Kari Nielsen, Anita Schmidt Casslén.

*Norway: Oslo University Hospital:* Per Helsing, Per Arne Andresen, Helge Rootwelt.  
*University of Bergen:* Lars A. Akslen, Anders Molven.

*Paris:* Florence Demenais, Marie-Françoise Avril, Brigitte Bressac-de Paillerets, Valérie Chaudru, Nicolas Chateigner, Eve Corda, Patricia Jeannin, Fabienne Lesueur, Mahaut de Lichy, Eve Maubec, Hamida Mohamdi and the French Family Study Group including the following Oncogeneticists and Dermatologists: Pascale Andry-Benzaquen, Bertrand Bachollet, Frédéric Bérard, Pascaline Berthet, Françoise Boitier, Valérie Bonadona, Jean-Louis Bonafé, Jean-Marie Bonnetblanc, Frédéric Cambazard, Olivier Caron, Frédéric Caux, Jacqueline Chevrant-Breton, Agnès Chompret (deceased), Stéphane Dalle, Liliane Demange, Olivier Dereure, Martin-Xavier Doré, Marie-Sylvie Doutre, Catherine Dugast, Laurence Faivre, Florent Grange, Philippe Humbert, Pascal Joly, Delphine Kerob, Christine Lasset, Marie Thérèse Leccia, Gilbert Lenoir, Dominique Leroux, Julien Levang, Dan Lipsker, Sandrine Mansard, Ludovic Martin, Tanguy Martin-Denavit, Christine Mateus, Jean-Loïc Michel, Patrice Morel, Laurence Olivier-Faivre, Jean-Luc Perrot, Caroline Robert, Sandra Ronger-Savle, Bruno Sassolas, Pierre Souteyrand, Dominique Stoppa-Lyonnet, Luc Thomas, Pierre Vabres, Eva Wierzbicka.

*Philadelphia:* David Elder, Peter Kanetsky, Jillian Knorr, Michael Ming, Nandita Mitra, Althea Ruffin, Patricia Van Belle

*Poland:* Tadeusz Dębniak, Jan Lubiński, Aneta Mirecka, Sławomir Ertmański.

*Slovenia:* Srdjan Novakovic, Marko Hocevar, Barbara Peric, Petra Cerkovnik.

*Stockholm:* Veronica Höiom, Johan Hansson.

*Sydney:* Graham J. Mann, Richard F. Kefford, Helen Schmid, Elizabeth A. Holland

*Tel Aviv:* Esther Azizi, Gilli Galore-Haskel, Eitan Friedman, Orna Baron-Epel, Alon Scope, Felix Pavlotsky, Emanuel Yakobson, Irit Cohen-Manheim, Yael Laitman, Roni Milgrom, Iris Shimoni, Evgeniya Kozlova.

### **Q-MEGA and AMFS investigators:**

Elizabeth A Holland<sup>3</sup>, Jimmy Z. Liu<sup>6</sup>, Zhen Zhen Zhao<sup>6</sup>, Joanne F Aitken<sup>4</sup>, Anjali K. Henders<sup>6</sup>, Mitchell Stark<sup>6</sup>, Bruce K Armstrong<sup>1</sup>, David L. Duffy<sup>6</sup>, Graham G Giles<sup>2,5</sup>, Jodie N. Painter<sup>6</sup>, Richard F Kefford<sup>3</sup>, David C. Whiteman<sup>6</sup>, Helen Schmid<sup>3</sup>, Grant W. Montgomery<sup>6</sup>, John L Hopper<sup>2</sup>, Nicholas G. Martin<sup>6</sup>

<sup>1</sup> Cancer Epidemiology and Services Research, Sydney School of Public Health, The University of Sydney

<sup>2</sup> Centre for Molecular, Environmental, Genetic and Analytic (MEGA) Epidemiology, Melbourne School of Population Health, University of Melbourne, Melbourne, Australia

<sup>3</sup> Westmead Institute for Cancer Research, University of Sydney at Westmead Millennium Institute and Melanoma Institute Australia, Sydney, Australia

<sup>4</sup> Viertel Centre for Research in Cancer Control, Cancer Council Queensland, Spring Hill, Brisbane, Australia

<sup>5</sup> Cancer Epidemiology Centre, Cancer Council Victoria, Melbourne, Australia

<sup>6</sup> Queensland Institute of Medical Research, Brisbane, QLD 4029, Australia
